# Supplementary material for: Scalable synthesis of FeS2 nanoparticles encapsulated into N-doped carbon nanosheets as a high-performance sodium-ion battery anode
Source: Royal Society of Chemistry journal article supplement (doi:10.1039/c8nr10444a), 2019-01-01
Supplement: c8nr10444a1.pdf [file c8nr10444a1.pdf]

## **Scalable Synthesis of FeS<sub>2</sub> Nanoparticles Encapsulated into N-doped Carbon Nanosheet as High-performance Sodium-ion Battery Anode**

Zhihua Lin<sup>a</sup>, Xunhui Xiong<sup>\*a</sup>, Mengna Fan<sup>a</sup>, Dong Xie<sup>\*b</sup>, Gang Wang<sup>a</sup>, Chenghao Yang<sup>a</sup>, Meilin Liu<sup>c</sup>

<sup>a</sup> Guangzhou Key Laboratory of Surface Chemistry of Energy Materials, New Energy Research Institute, School of Environment and Energy, South China University of Technology, Guangzhou 510006, China

<sup>b</sup> Guangdong Engineering and Technology Research Center for Advanced Nanomaterials, School of Environment and Civil Engineering, Dongguan University of Technology, Dongguan 523808, China

<sup>c</sup> School of Materials Science & Engineering, Georgia Institute of Technology, 771 Ferst Drive, Atlanta, GA 30332-0245, USA

\* E-mail: [esxxiong@scut.edu.cn](mailto:esxxiong@scut.edu.cn) (X. Xiong)

## **Experimental**

### **Method**

Synthesis of ZnO/CNS: The ZnO/CNS template was prepared by solution combustion methods. In a typical process, 5.68 g of Zn(NO<sub>3</sub>)<sub>2</sub> and 1.80 g of glucose was dissolve in 20 ml of deionized water in a beaker. After 10 min magnetic stirring, the beaker was placed into an oven and heated at 220°C. After several minutes, the brownness foamy product was generated. Then the product was annealed at 800°C for 1 h under N<sub>2</sub>.

Synthesis of FeS<sub>2</sub>/CNS: 0.2 g of obtained ZnO/CNS template was soaked into the solution of 6.48 g FeCl<sub>3</sub> and 100 ml deionized water for 6 h. The obtained powders were filtered and washed with deionized water and ethanol three times and dried at 80°C overnight. Then 0.5 g as-prepared precursor and 3 g sulfur powder were loaded into two individual boats and placed in the middle and upstream of the furnace. After annealed at 500°C for 2 h with a temperature rate of 2°C min<sup>-1</sup> at N<sub>2</sub> atmosphere, FeS<sub>2</sub>/CNS was obtained. For comparison, bulk FeS<sub>2</sub> was synthesis by the same method except for ZnO/CNS template was annealed at 800°C for 1 h under air. Pure CNS was obtained by removing the particles on the ZnO/CNS template with 2 M HCl.

### **Material characterization**

The X-ray diffraction patterns were conducted on Rigaku D/max 2500 using Cu K $\alpha$  radiation worked in the 2 $\theta$  range of 10-90° with a scanning step of 0.12° s<sup>-1</sup>. Raman and XPS measurement were performed by Renishaw RM1000 micro spectroscopic system and Thermo K-Alpha XPS spectrometer respectively. The BET specific surface areas were obtained using a Micromeritics ASAP 2020 analyzer at the boiling point of liquid nitrogen (77 K). Thermogravimetric analysis (TGA) was carried out in air (air flow: 100 ml min<sup>-1</sup>) with a heating rate of 10°C min<sup>-1</sup> from 30 to 800°C. The materials morphologies were measured by FESEM (Hitachi S-4800) and TEM (JEM-2010 JEOL, 200 kV).

### **Electrochemical measurements**

The sodium storage performances of all samples were characterized by fabricating CR2032 coin-type half-cells in an Ar glove box. The anode electrode was prepared by

mixing the active material, acetylene black, and polyvinylidene fluoride (PVDF) binder with a mass ratio of 8:1:1 in N-methyl-2-pyrrolidone solvent. The obtained slurry was coated onto copper (Cu) foil and dried at 110 °C under vacuum for 12 h. Generally, the mass loading of the active material is about packing density of  $\sim 0.8 \text{ g cm}^{-3}$ . The electrolyte was a solution of 1 M  $\text{NaCF}_3\text{SO}_3$  in diglyme with 5 % fluoroethylenecarbonate (FEC) additive. CV measurements were carried out by a CHI660E electrochemical workstation. LAND-BT2013A measurement system is responded for testing cycling performance and rate capacity at 25 °C.

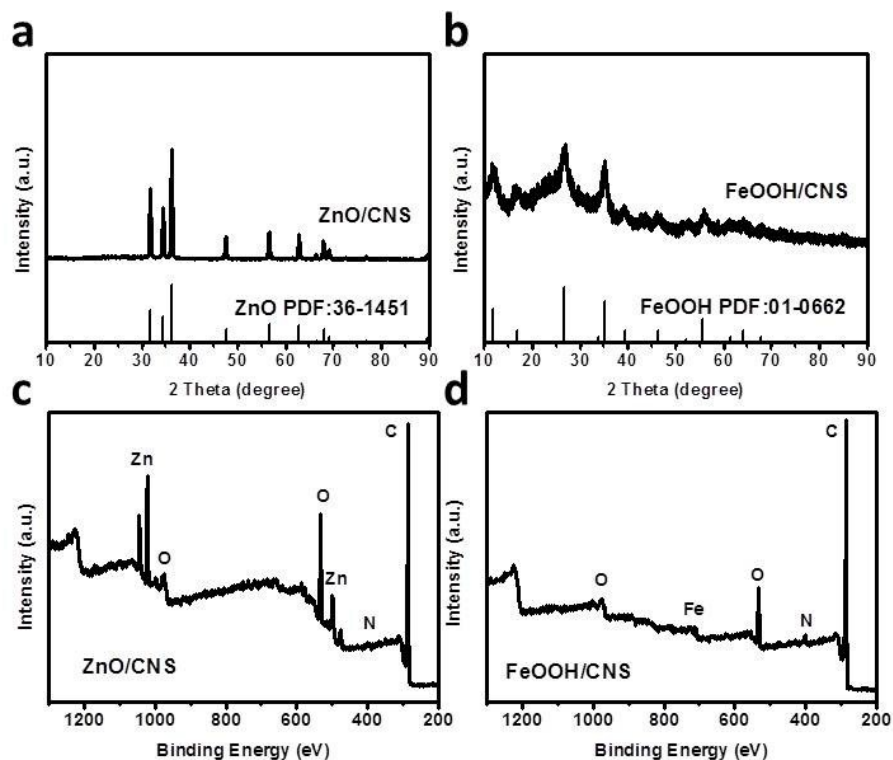

**Fig. S1.** XRD patterns of (a) ZnO/CNS and (b) FeOOH/CNS; survey XPS spectra of (c) ZnO/CNS and (d) FeOOH/CNS.

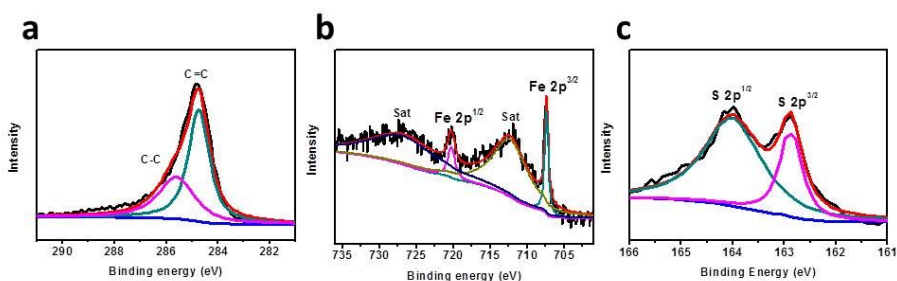

**Fig. S2.** (a)-(c) High resolution XPS spectra of C 1s, Fe 2p and S 2p in FeS<sub>2</sub>/CNS, respectively.

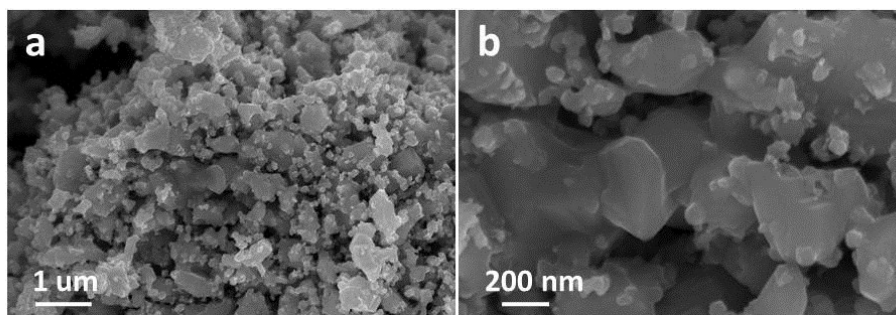

**Fig. S3.** (a)-(b) SEM images of bulk FeS<sub>2</sub>, showing dense agglomerates.

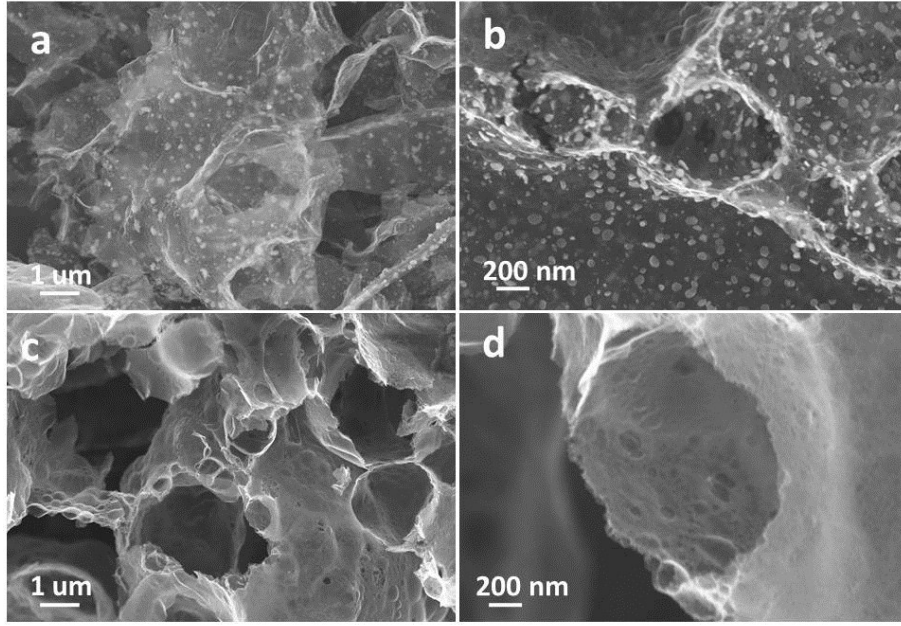

**Fig. S4.** SEM images at different magnifications of (a)-(b) ZnO/CNS and (c)-(d) CNS.

Base on the fact that  $\text{FeS}_2$  is fully converted into  $\text{Fe}_2\text{O}_3$  at  $800^\circ\text{C}$  in air, it can be calculated that the weight content of carbon and  $\text{FeS}_2$  in  $\text{FeS}_2/\text{CNS}$  composite is around 8.5% and 91.5%, respectively. The detailed calculation process is presented as follow:

$$wt(\text{FeS}_2) = \frac{wt(\text{residue}) \times 2 M(\text{FeS}_2)}{M(\text{Fe}_2\text{O}_3)} = \frac{wt(\text{residue}) \times 240}{160} = wt(\text{residue}) \times \frac{3}{2}$$

$$wt(\text{C}) = 100\% - wt(\text{FeS}_2)$$

Thus, the  $\text{FeS}_2$  content of two  $\text{FeS}_2/\text{CNS}$  composite showed in Fig. S5 is 91.5% and 68.6%, respectively. It is feasible to control the content of  $\text{FeS}_2$  in the composite by controlling the amount of glucose during solution combustion process. With higher content of  $\text{FeS}_2$ , the composite performs higher specific capacity and poorer cycle stability.

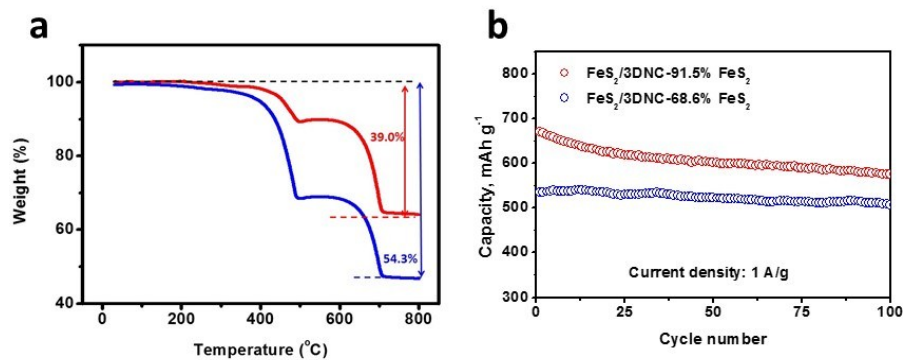

**Fig. S5.** (a) TG curves and (b) cycling performance of the FeS<sub>2</sub>/CNS with different FeS<sub>2</sub> content.

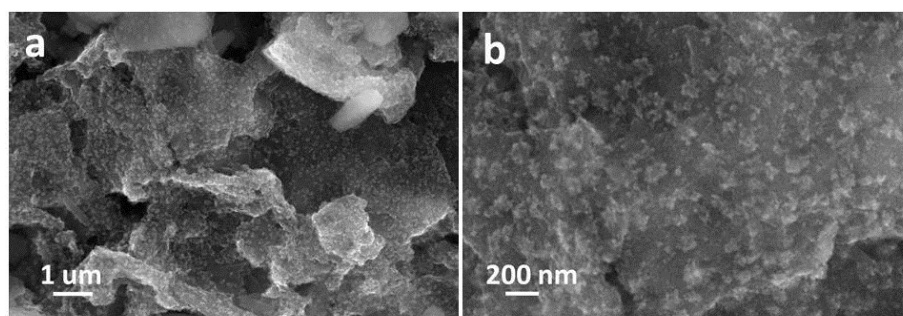

**Fig. S6.** (a)-(b) SEM images of FeS<sub>2</sub>/CNS electrode after 50 cycles at 1 A g<sup>-1</sup>.

The specific surface area of FeS<sub>2</sub>/CNS, CNS and FeS<sub>2</sub> are 576.6, 2446.3, 5.33 m<sup>2</sup> g<sup>-1</sup>, respectively. It is proved that the composited construction of FeS<sub>2</sub> and CNS greatly improves the specific surface area of FeS<sub>2</sub>.

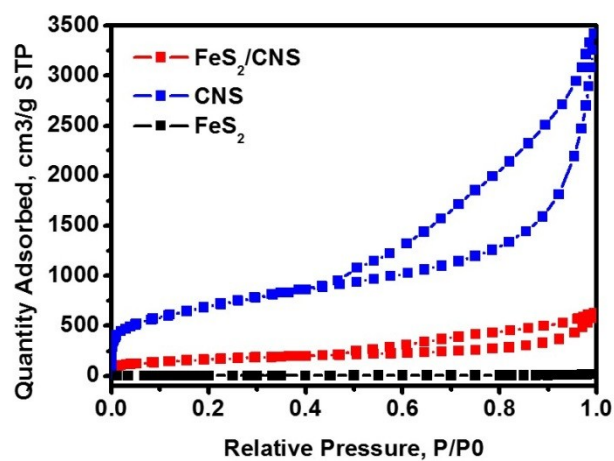

**Fig. S7.** Nitrogen adsorption-desorption isotherms of FeS<sub>2</sub>/CNS, FeS<sub>2</sub> and CNS.
